# Supplementary material for: Quercetin- and caffeic acid-functionalized chitosan-capped colloidal silver nanoparticles: one-pot synthesis, characterization, and anticancer and antibacterial activities
Source: publisher site journal article supplement (doi:10.3762/bjnano.14.31), 2023-03-20
Supplement: Additional file 1 [file 2190-4286-14-31-S1.pdf]

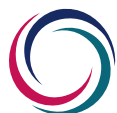

## Supporting Information

for

### **Quercetin- and caffeic acid-functionalized chitosan-capped colloidal silver nanoparticles: one-pot synthesis, characterization, and anticancer and antibacterial activities**

Akif Hakan Kurt, Elif Berna Olutas, Fatma Avcioglu, Hamza Karakuş, Mehmet Ali Sungur, Cansu Kara Oztabag and Muhammet Yıldırım

*Beilstein J. Nanotechnol.* **2023**, *14*, 362–376. [doi:10.3762/bjnano.14.31](https://doi.org/10.3762/bjnano.14.31)

## Additional figures

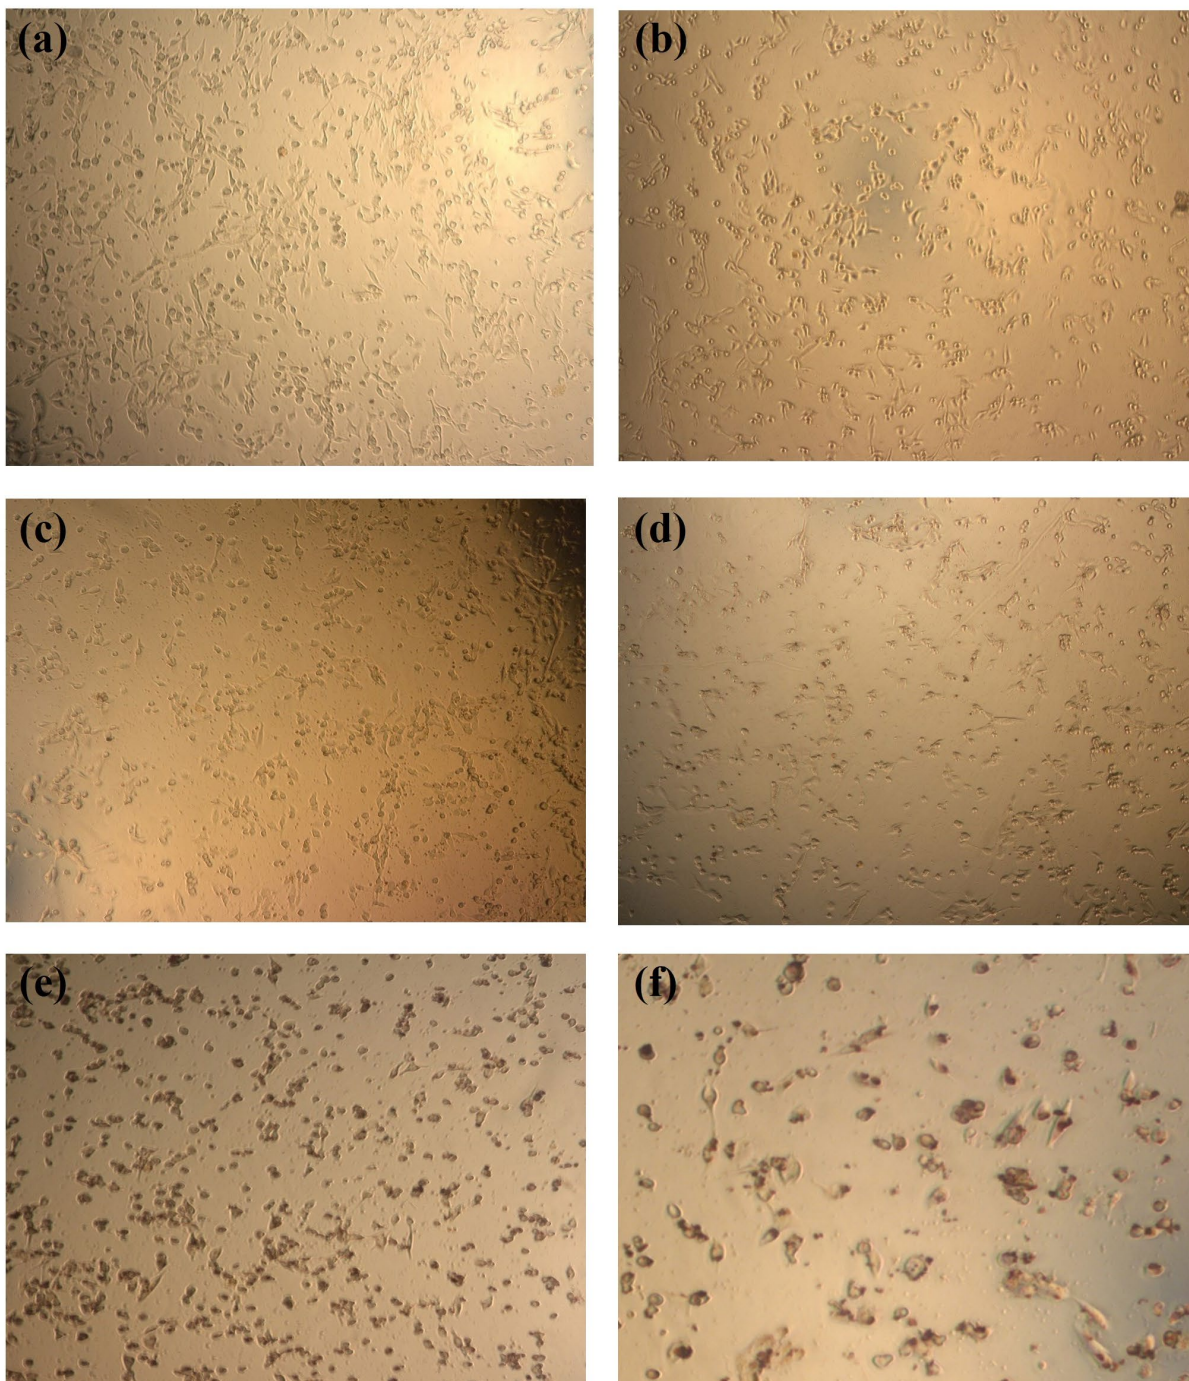

**Figure S1:** Morphological images of the U118-MG cell line (a) in medium only (no NPs), after applying different concentrations of Ch/Q-Ag NPs in dilutions of (b) 1/5, (c) 1/4, (d) 1/3, (e) 1/2, and (f) 1/1.

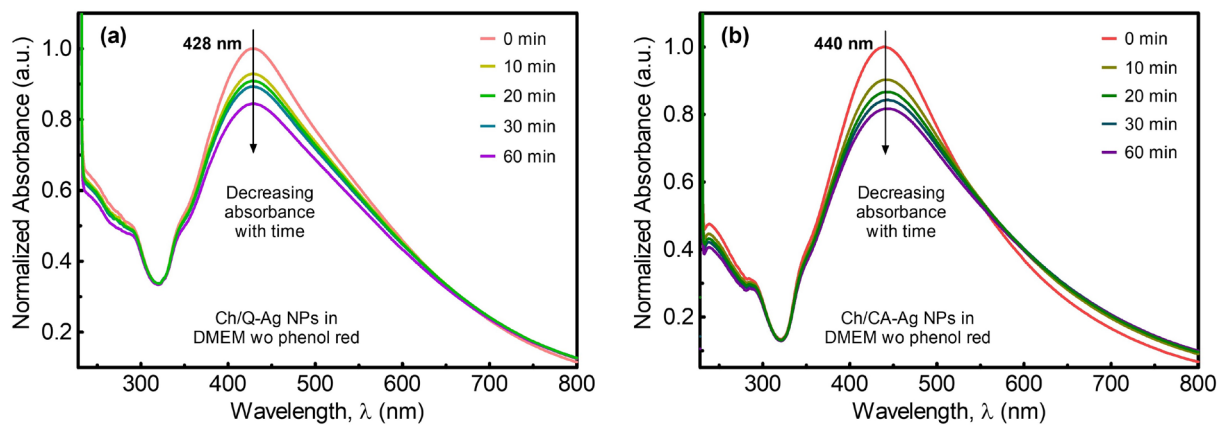

**Figure S2:** Time-dependent UV-vis absorption measurements for (a) chitosan/queracetin (Ch/Q)- and (b) chitosan/caffeic acid (Ch/CA)-capped Ag NPs in DMEM medium without phenol red (1/10 dilution).

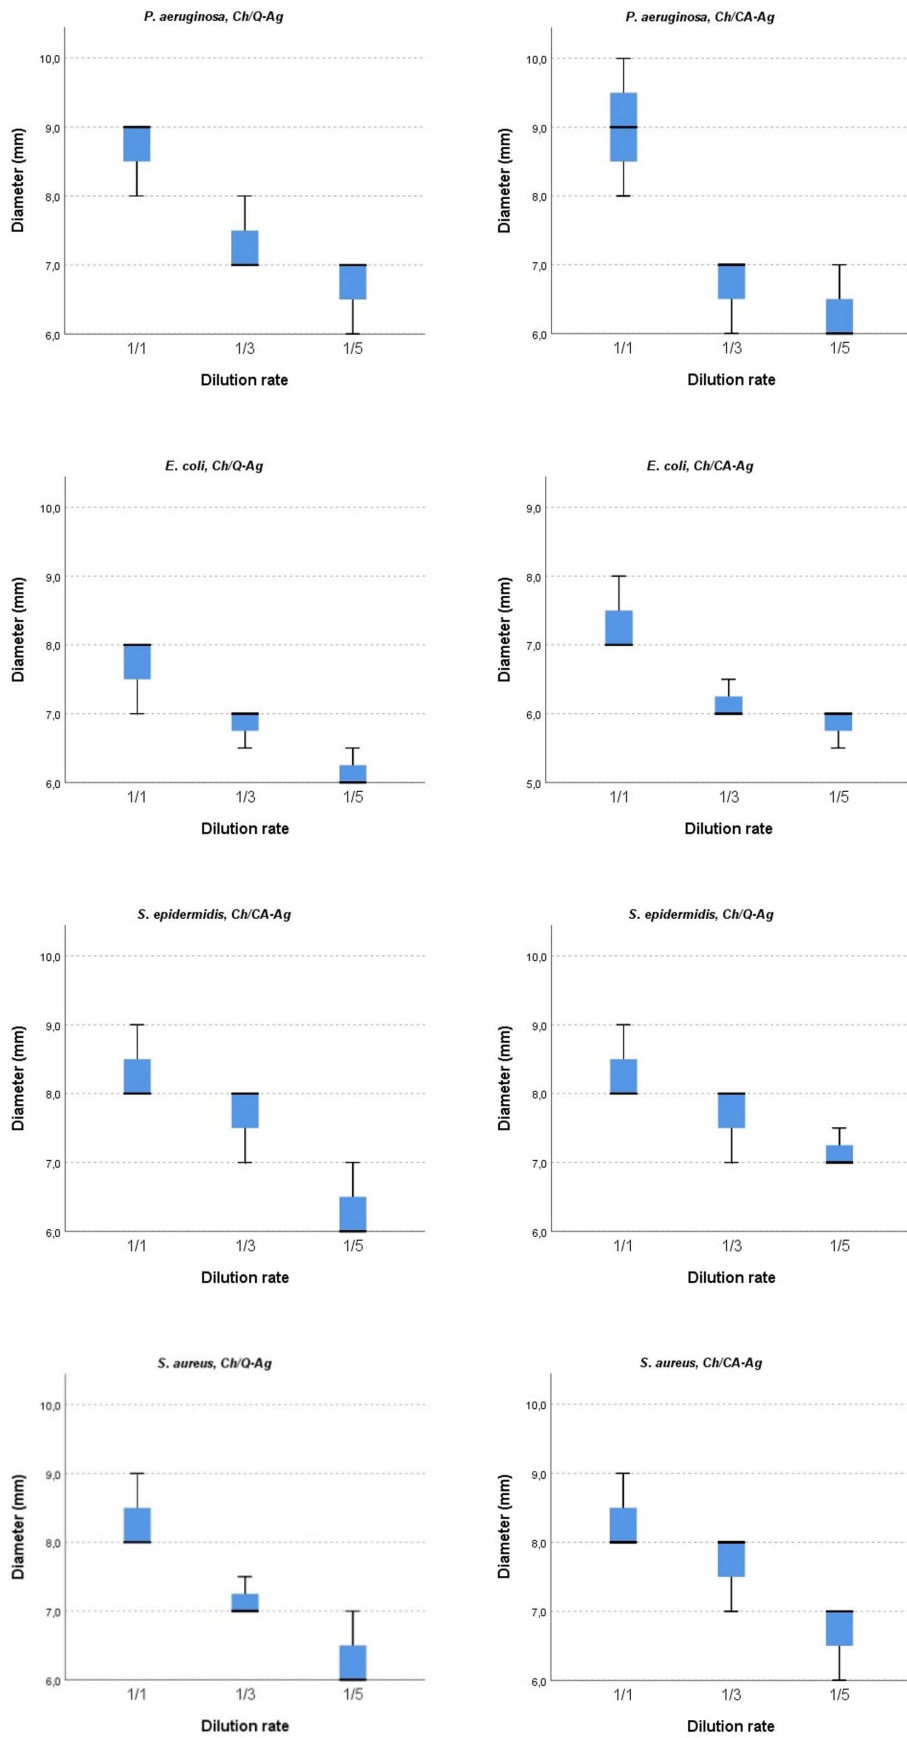

**Figure S3:** Antibacterial activities of Ch/Q- and Ch/CA-Ag NPs in terms of inhibition zone diameters by disc diffusion. Graphical evaluation of Table 1 in the article.
